# Supplementary material for: Efficacy of Antimicrobial Peptide DP7, Designed by Machine-Learning Method, Against Methicillin-Resistant Staphylococcus aureus
Source: PubMed Central journal article supplement (PMC6546875; doi:10.3389/fmicb.2019.01175), 2019-05-28
Supplement: Data_Sheet_1.pdf [file Data_Sheet_1.pdf]

Table s1: Analysis of differentially expressed genes of ATCC 25923 treated with 1MIC DP7 or PBS

Table s2: Analysis of differentially expressed genes of ATCC 33591 treated with 1MIC DP7 or PBS

Table s3: Gene ontology enrichment analysis of differentially expressed genes in ATCC 25923 treated with 1MIC DP7 or PBS

Table s4: Gene ontology enrichment analysis of differentially expressed genes in ATCC 33591 treated with 1MIC DP7 or PBS

Table s5: qRT-PCR primers used in this study

| Name              | Sequence(5'→3')a         | Name              | Sequence(5'→3')a       |
|-------------------|--------------------------|-------------------|------------------------|
| <i>sigB</i> -RT-F | AATGGTCATCTTGTTGTCCT     | <i>sigB</i> -RT-R | ACCGCTGAATTAGAGCGTTCA  |
| <i>rsbU</i> -RT-F | AGCCATCACTCGGTAATTGTGA   | <i>rsbU</i> -RT-R | TTCAGTGCGGCACAAAAAG    |
| <i>rsbV</i> -RT-F | CCTACGAATAAACCTAACCTGTCG | <i>rsbV</i> -RT-R | ACGAAGTTAAAGTCGGTGGAGA |
| <i>rsbW</i> -RT-F | TGTTTAACTGCATTTGTCACAGC  | <i>rsbW</i> -RT-R | TTTATCGAAATGCGCGTGCC   |
| <i>gyrB</i> -RT-F | ATTGCACAGCCACCGTTGTA     | <i>gyrB</i> -RT-R | CGGTGCTCAGGGTTCATTGT   |

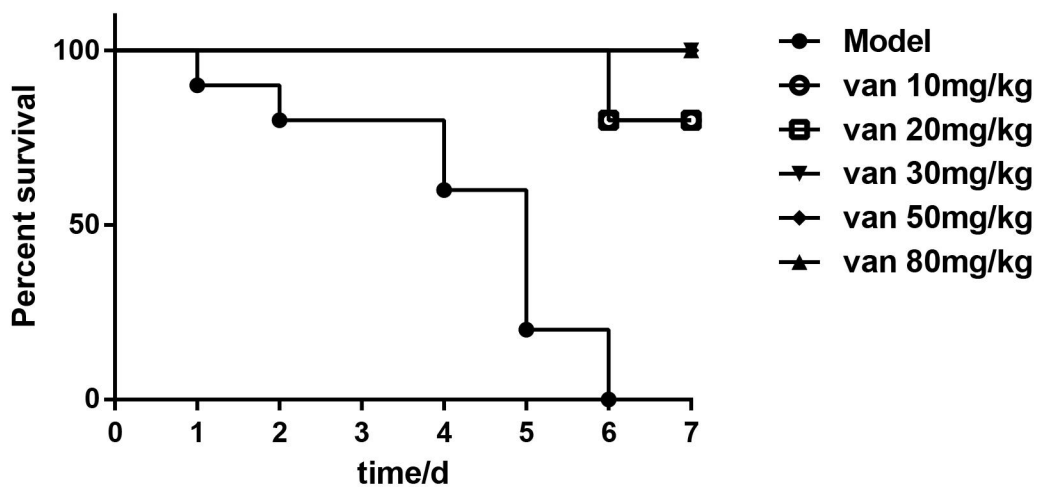

**Figure S1.** Experimental murine model of blood stream infection. C57 female mice were infected with  $1 \times 10^8$  CFU of MRSA ATCC 33591 by intravenous injection, and different concentrations of vancomycin were administered 1 h after injection. Then the survival of mice was counted every 24 hours.
