# Supplementary material for: Efficacy of Antimicrobial Peptide DP7, Designed by Machine-Learning Method, Against Methicillin-Resistant Staphylococcus aureus
Source: Front Microbiol. 2019 May 28;10:1175. doi: 10.3389/fmicb.2019.01175 (PMC6546875; doi:10.3389/fmicb.2019.01175)
Supplement: Supplementary file 1 [file Table_1.XLSX]

## Sheet: 25923CT-DP7 8
Table s1 Analysis of differentially expressed genes of ATCC 25923 treated with 1MIC DP7 or PBS
geneID	Symbol	Description	geneLength	25923CT-Expression	25923DP7-Expression	25923CT-RPKM	25923DP7-RPKM	log2 Ratio(25923DP7/25923CT)	Up-Down-Regulation(25923DP7/25923CT)	P-value	FDR
gene456	KQ76_RS02285	hypothetical protein	132	1	20	0.250131	5.30647	4.407	Up	6.00876e-06	9.13262e-06
gene2343	KQ76_RS11720	hypothetical protein	189	6	50	1.04817	9.26527	3.14396	Up	1.45897e-10	2.58208e-10
gene2452	KQ76_RS12265	nitrate reductase sununit delta	576	1923	13280	110.23	807.468	2.87289	Up	0	0
gene2453	narH	nitrate reductase	1560	7003	40468	148.218	908.525	2.6158	Up	0	0
gene2632	KQ76_RS13165	4%2C4'-diaponeurosporenoate glycosyltransferase	1128	2762	15383	80.8456	477.619	2.56262	Up	0	0
gene1104	KQ76_RS05525	hypothetical protein	1557	2805	15308	59.4821	344.334	2.53328	Up	0	0
gene2101	KQ76_RS10510	RNA polymerase sigma factor SigB	771	10482	53017	448.882	2408.3	2.42361	Up	0	0
gene164	KQ76_RS00825	pyruvate formate-lyase-activating enzyme	756	33741	168030	1473.6	7784.22	2.40121	Up	0	0
gene2633	KQ76_RS13170	diapolycopene oxygenase	1494	4295	20173	94.9193	472.901	2.31676	Up	0	0
gene347	KQ76_RS01740	peptidase	573	9940	43795	572.761	2676.82	2.22452	Up	0	0
gene2455	KQ76_RS12280	uroporphyrinogen III methyltransferase	978	6611	28799	223.188	1031.31	2.20815	Up	0	0
gene1964	KQ76_RS09825	ribonuclease BN	1218	9497	41314	257.443	1187.95	2.20615	Up	0	0
gene1239	KQ76_RS06200	aerobic glycerol-3-phosphate dehydrogenase	1674	10222	43500	201.615	910.089	2.17441	Up	0	0
gene1103	KQ76_RS05520	carbamate kinase 1	933	1184	4966	41.8998	186.412	2.15348	Up	0	0
gene2410	KQ76_RS12055	hypothetical protein	270	7	29	0.856005	3.7617	2.13569	Up	9.40298e-05	0.000135867
gene166	KQ76_RS00835	glycerophosphoryl diester phosphodiesterase	1764	762	3150	14.2626	62.5406	2.13256	Up	0	0
gene2631	KQ76_RS13160	dehydrosqualene synthase	864	1954	7982	74.6712	323.555	2.11539	Up	0	0
gene346	KQ76_RS01735	hypothetical protein	369	24	98	2.14747	9.30143	2.11481	Up	5.27418e-13	9.85685e-13
gene1254	KQ76_RS06275	hypothetical protein	417	21	84	1.66274	7.05494	2.08507	Up	3.67284e-11	6.57521e-11
gene2257	KQ76_RS11290	toxin	426	1254	4966	97.1919	408.27	2.07061	Up	0	0
gene2456	KQ76_RS12285	nitrite reductase NAD(P)H small subunit	315	2026	7627	212.359	847.995	1.99755	Up	0	0
gene1109	KQ76_RS05550	hypothetical protein	135	35	128	8.56005	33.2067	1.95578	Up	4.25452e-15	8.2982e-15
gene711	KQ76_RS03560	lipid kinase	918	7985	28075	287.193	1071.09	1.89899	Up	0	0
gene2102	KQ76_RS10515	serine-protein kinase RsbW	480	4052	14153	278.721	1032.66	1.88947	Up	0	0
gene2346	KQ76_RS11735	AraC family transcriptional regulator	1956	1541	5357	26.0121	95.9186	1.88263	Up	0	0
gene2480	KQ76_RS12405	gamma-hemolysin component A	930	1789	6097	63.514	229.606	1.85401	Up	0	0
gene2350	KQ76_RS11755	octopine dehydrogenase	1083	4218	14347	128.594	463.962	1.85119	Up	0	0
gene1226	KQ76_RS06135	hypothetical protein	216	178	605	27.2087	98.0961	1.85013	Up	5.34056e-61	1.71119e-60
gene2687	KQ76_RS13440	ribonucleoside-triphosphate reductase activating protein	537	1649	5553	101.388	362.162	1.83674	Up	0	0
gene2234	KQ76_RS11175	glycine/betaine ABC transporter permease	1563	18287	60961	386.301	1365.98	1.82214	Up	0	0
gene601	KQ76_RS03010	cation:proton antiporter	2403	2715	8990	37.3042	131.025	1.81244	Up	0	0
gene809	KQ76_RS04050	membrane protein	852	1733	5733	67.1585	235.663	1.81109	Up	0	0
gene2778	KQ76_RS13895	ABC transporter ATP-binding protein	759	282	924	12.2673	42.6364	1.79727	Up	1.11307e-88	4.23546e-88
gene664	KQ76_RS03325	hypothetical protein	459	2873	9388	206.664	716.325	1.79333	Up	0	0
gene2349	KQ76_RS11750	sodium:proton antiporter	1398	2675	8613	63.177	215.773	1.77204	Up	0	0
gene829	KQ76_RS04150	hypothetical protein	153	819	2622	176.74	600.193	1.7638	Up	9.50536e-242	6.02539e-241
gene54	KQ76_RS00275	hypothetical protein	1776	7847	25044	145.882	493.868	1.75932	Up	0	0
gene1373	KQ76_RS06870	signal transduction histidine-protein kinase ArlS	1356	5222	16449	127.151	424.844	1.74039	Up	0	0
gene2704	KQ76_RS13525	alkaline phosphatase	1425	254	796	5.8852	19.5636	1.73301	Up	6.23718e-73	2.14439e-72
gene1099	KQ76_RS05500	hypothetical protein	717	399	1248	18.3737	60.9601	1.73022	Up	4.74022e-113	2.01938e-112
gene1901	KQ76_RS09510	membrane protein	396	300	937	25.0131	82.8694	1.72815	Up	3.36242e-85	1.25947e-84
gene2384	KQ76_RS11925	metallothiol transferase FosB	420	93	289	7.31098	24.099	1.72083	Up	2.7792e-27	6.50288e-27
gene795	KQ76_RS03980	organic hydroperoxide resistance protein-like	423	1652	5129	128.947	424.661	1.71953	Up	0	0
gene2448	KQ76_RS12245	oxygen regulatory protein NreC	654	4487	13741	226.527	735.852	1.69973	Up	0	0
gene99	KQ76_RS00500	capsular polysaccharide biosynthesis protein Cap8C	765	1045	3197	45.1021	146.363	1.69828	Up	4.1162e-279	2.81933e-278
gene1903	KQ76_RS09520	hypothetical protein	153	3516	10733	758.751	2456.86	1.69511	Up	0	0
gene2451	KQ76_RS12260	nitrate reductase subunit gamma	678	3167	9649	154.227	498.428	1.69233	Up	0	0
gene761	KQ76_RS03810	Epimerase family protein SAR0825	903	5587	16889	204.283	655.037	1.68101	Up	0	0
gene561	KQ76_RS02810	amino acid permease	1485	33232	99586	738.877	2348.67	1.66844	Up	0	0
gene1400	KQ76_RS07005	L-threonine dehydratase catabolic TdcB	1041	237	708	7.51692	23.8195	1.66393	Up	1.63587e-61	5.26714e-61
gene636	KQ76_RS03185	hypothetical protein	189	77	230	13.4515	42.6202	1.66377	Up	4.51254e-21	9.72187e-21
gene98	KQ76_RS00495	capsular polysaccharide biosynthesis protein Cap5B	687	1304	3830	62.6705	195.25	1.63947	Up	0	0
gene2740	KQ76_RS13705	GNAT family acetyltransferase	501	62	182	4.08598	12.7228	1.63867	Up	1.18445e-16	2.37521e-16
gene1887	KQ76_RS09440	hypothetical protein	366	10833	31717	977.259	3035.02	1.63489	Up	0	0
gene642	KQ76_RS03215	bacitracin ABC transporter ATP-binding protein	762	7854	22968	340.313	1055.65	1.63319	Up	0	0
gene2703	KQ76_RS13520	hypothetical protein	174	12	35	2.27706	7.0448	1.62939	Up	0.000337986	0.000473324
gene2231	KQ76_RS11160	alkaline shock protein 23	510	187222	533893	12120.7	36663.5	1.59687	Up	0	0
gene265	KQ76_RS01330	pyrimidine nucleoside transporter NupC	1221	1867	5279	50.486	151.421	1.58461	Up	0	0
gene1821	KQ76_RS09110	camphor resistance protein CrcB	366	39	110	3.51824	10.526	1.58102	Up	3.68862e-10	6.42888e-10
gene1904	KQ76_RS09525	glucosamine-6-phosphate isomerase	600	25126	70811	1382.66	4133.32	1.57986	Up	0	0
gene2232	KQ76_RS11165	membrane protein	240	27360	76677	3763.98	11189.3	1.57179	Up	0	0
gene808	KQ76_RS04045	hypothetical protein	195	23619	66190	3999.16	11888	1.57173	Up	0	0
gene777	KQ76_RS03890	membrane protein	522	359	1005	22.7073	67.4288	1.57021	Up	9.6369e-80	3.49073e-79
gene2643	KQ76_RS13220	glyoxalase	378	823	2262	71.887	209.58	1.5437	Up	8.82268e-173	4.56184e-172
gene2463	KQ76_RS12320	zinc ABC transporter substrate-binding protein	1548	1418	3896	30.2446	88.145	1.5432	Up	5.67484e-296	3.96938e-295
gene1100	KQ76_RS05505	hypothetical protein	726	280	769	12.734	37.0971	1.54262	Up	6.60856e-60	2.08454e-59
gene1820	KQ76_RS09105	membrane protein	303	309	848	33.6711	98.0174	1.54152	Up	8.22788e-66	2.74297e-65
gene2522	KQ76_RS12615	membrane protein	777	1014	2782	43.0883	125.397	1.54113	Up	1.60134e-211	9.40475e-211
gene1399	KQ76_RS07000	amino acid permease	1323	308	839	7.68658	22.2102	1.53081	Up	1.75011e-64	5.75443e-64
gene661	KQ76_RS03310	hypothetical protein	300	1504	4094	165.527	477.943	1.52977	Up	4e-307	2.85081e-306
gene1006	KQ76_RS05035	hypothetical protein	135	56	152	13.6961	39.433	1.52564	Up	6.79216e-13	1.2649e-12
gene2139	KQ76_RS10700	3-hydroxyacyl-[acyl-carrier-protein] dehydratase FabZ	441	4007	10764	300.001	854.84	1.51069	Up	0	0
gene1809	KQ76_RS09050	pyridine nucleotide-disulfide oxidoreductase	1503	1138	3023	24.9992	70.4416	1.49455	Up	1.50935e-219	9.0253e-219
gene663	KQ76_RS03320	lysine decarboxylase	567	4412	11697	256.918	722.506	1.4917	Up	0	0
gene1009	KQ76_RS05050	hypothetical protein	543	14673	38864	892.198	2506.67	1.49034	Up	0	0
gene1777	KQ76_RS08890	membrane protein	1191	49803	131397	1380.66	3863.88	1.4847	Up	0	0
gene1660	KQ76_RS08305	hypothetical protein	147	1277	3329	286.824	793.134	1.4674	Up	4.3202e-235	2.69323e-234
gene2449	KQ76_RS12250	oxygen sensor histidine kinase NreB	1035	7814	20369	249.273	689.254	1.46731	Up	0	0
gene350	KQ76_RS01755	hypothetical protein	210	32	83	5.03121	13.8423	1.46011	Up	2.94532e-07	4.72146e-07
gene2726	KQ76_RS13635	glycosyl transferase family 4	1509	6708	17330	146.773	402.216	1.45438	Up	0	0
gene2609	KQ76_RS13050	holin-like protein CidA	396	96	248	8.0042	21.9334	1.4543	Up	7.77848e-19	1.61511e-18
gene97	KQ76_RS00490	capsular polysaccharide biosynthesis protein Cap5A	669	1228	3168	60.6058	165.848	1.45233	Up	2.06702e-220	1.2388e-219
gene778	KQ76_RS03895	acetyltransferase	531	701	1804	43.5879	118.985	1.44878	Up	6.5327e-126	2.91484e-125
gene961	KQ76_RS04810	hypothetical protein	198	58	149	9.67175	26.3555	1.44625	Up	8.23814e-12	1.50131e-11
gene2681	KQ76_RS13410	betaine-aldehyde dehydrogenase	1491	5069	13003	112.25	305.433	1.44414	Up	0	0
gene2103	KQ76_RS10520	anti-sigma-B factor antagonist	327	3464	8884	349.762	951.504	1.44384	Up	0	0
gene2779	KQ76_RS13900	bacitracin ABC transporter permease	1881	873	2238	15.3238	41.6698	1.44322	Up	7.61006e-155	3.66199e-154
gene2378	KQ76_RS11895	membrane protein	570	360	918	20.8531	56.405	1.43556	Up	4.076e-64	1.33521e-63
gene659	KQ76_RS03300	GNAT family acetyltransferase	444	31	79	2.30526	6.23152	1.43465	Up	8.00998e-07	1.2633e-06
gene165	KQ76_RS00830	hypothetical protein	168	24	61	4.71676	12.7166	1.43084	Up	1.54767e-05	2.31754e-05
gene600	KQ76_RS03005	recombinase	561	275	696	16.185	43.4506	1.42472	Up	1.69534e-48	4.81746e-48
gene2716	KQ76_RS13585	hypothetical protein	528	15478	39033	967.883	2589.09	1.41954	Up	0	0
gene2233	KQ76_RS11170	hypothetical protein	537	97908	246793	6019.85	16095.6	1.41887	Up	0	0
gene841	KQ76_RS04210	sodium:proton antiporter	1317	3747	9386	93.9377	249.6	1.40984	Up	0	0
gene1459	KQ76_RS07300	holin	303	22	55	2.3973	6.35726	1.407	Up	5.13646e-05	7.51239e-05
gene746	KQ76_RS03735	hypothetical protein	237	58	145	8.08019	21.4274	1.407	Up	4.03264e-11	7.21443e-11
gene1778	KQ76_RS08895	hypothetical protein	492	44399	110379	2979.55	7857.26	1.39893	Up	0	0
gene2022	KQ76_RS10115	GntR family transcriptional regulator	381	269	667	23.3115	61.3127	1.39515	Up	3.8175e-45	1.05081e-44
gene1868	KQ76_RS09345	enterotoxin	765	183	448	7.89827	20.51	1.37672	Up	2.77598e-30	6.72818e-30
gene2379	KQ76_RS11900	oxidoreductase	882	7546	18455	282.482	732.817	1.3753	Up	0	0
gene1867	KQ76_RS09340	enterotoxin I	720	701	1712	32.146	83.2763	1.37326	Up	2.08076e-110	8.79321e-110
gene2514	KQ76_RS12575	choline ABC transporter permease	636	344	840	17.8584	46.2564	1.37305	Up	4.34046e-55	1.31712e-54
gene2630	KQ76_RS13155	dehydrosqualene desaturase	1509	4629	11244	101.284	260.965	1.36545	Up	0	0
gene1374	KQ76_RS06875	response regulator ArlR	660	2470	5997	123.565	318.229	1.3648	Up	0	0
gene688	KQ76_RS03445	glycosyltransferase	984	8755	21157	293.767	753.024	1.35802	Up	0	0
gene2239	KQ76_RS11200	PTS system lactose-specific transporter subunits IICB	1710	1207	2867	23.3052	58.7194	1.33318	Up	1.71909e-175	8.95899e-175
gene2082	KQ76_RS10415	ATPase	495	1072	2544	71.5042	179.996	1.33186	Up	1.03896e-155	5.02703e-155
gene728	KQ76_RS03645	hypothetical protein	321	2623	6217	269.796	678.306	1.33007	Up	0	0
gene1844	KQ76_RS09225	hypothetical protein	255	49	116	6.34451	15.9319	1.32834	Up	1.62373e-08	2.71342e-08
gene2140	KQ76_RS10705	UDP-N-acetylglucosamine 1-carboxyvinyltransferase 1	1266	19180	45119	500.215	1248.18	1.3192	Up	0	0
gene2031	KQ76_RS10160	succinyl-diaminopimelate desuccinylase	1224	5183	12190	139.811	348.797	1.31891	Up	0	0
gene326	KQ76_RS01635	hypothetical protein	273	35	82	4.23299	10.5196	1.31334	Up	2.5884e-06	3.9986e-06
gene1791	KQ76_RS08960	hypothetical protein	423	14412	33732	1124.93	2792.88	1.31191	Up	0	0
gene665	KQ76_RS03330	hypothetical protein	684	20325	47568	981.107	2435.62	1.3118	Up	0	0
gene2587	KQ76_RS12940	acetyltransferase	285	1631	3816	188.952	468.936	1.31137	Up	4.38028e-227	2.66762e-226
gene2238	KQ76_RS11195	6-phospho-beta-galactosidase	1413	1131	2638	26.4279	65.3857	1.30691	Up	8.63598e-157	4.21724e-156
gene163	KQ76_RS00820	formate acetyltransferase	2250	195539	454925	2869.41	7081.21	1.30324	Up	0	0
gene2816	KQ76_RS14085	hypothetical protein	975	7576	17593	256.553	631.954	1.30056	Up	0	0
gene2770	KQ76_RS13855	DNA damage-inducible protein DinB	465	740	1716	52.5437	129.245	1.29852	Up	1.14962e-101	4.6639e-101
gene1636	KQ76_RS08185	membrane protein	270	44	102	5.3806	13.2308	1.29806	Up	1.98981e-07	3.20338e-07
gene830	KQ76_RS04155	D-alanine--poly(phosphoribitol) ligase subunit 1	1458	96169	222806	2177.81	5352.04	1.29721	Up	0	0
gene351	KQ76_RS01760	phosphoglycerate mutase	582	1059	2448	60.0779	147.312	1.29397	Up	1.96107e-143	9.23452e-143
gene2709	KQ76_RS13550	carbamate kinase 2	942	19968	46142	699.883	1715.52	1.29346	Up	0	0
gene2499	KQ76_RS12500	hypothetical protein	474	178	410	12.3989	30.2939	1.28881	Up	2.58952e-25	5.90706e-25
gene1866	KQ76_RS09335	enterotoxin I	729	866	1990	39.2222	95.6039	1.2854	Up	8.87468e-116	3.82394e-115
gene1051	KQ76_RS05260	hypothetical protein	255	201	461	26.0254	63.3156	1.28264	Up	4.59588e-28	1.08305e-27
gene2715	KQ76_RS13580	zinc metalloproteinase aureolysin	1530	702	1607	15.1491	36.7853	1.27989	Up	3.00984e-93	1.17237e-92
gene635	KQ76_RS03180	lipase LipA	1044	1213	2774	38.3621	93.0585	1.27846	Up	2.77136e-159	1.36345e-158
gene369	KQ76_RS01850	growth inhibitor PemK	411	22	50	1.76735	4.26067	1.26949	Up	0.000363252	0.00050736
gene1858	KQ76_RS09295	serine protease SplC	720	174	394	7.97919	19.1652	1.26418	Up	1.03647e-23	2.31234e-23
gene2426	KQ76_RS12135	acetyltransferase	516	518	1171	33.1453	79.4799	1.26178	Up	5.57898e-67	1.86461e-66
gene1822	KQ76_RS09115	camphor resistance protein CrcB	354	219	495	20.426	48.9725	1.26157	Up	2.73692e-29	6.56711e-29
gene2241	KQ76_RS11210	tagatose 1%2C6-diphosphate aldolase	981	617	1393	20.7663	49.7316	1.25992	Up	3.75008e-79	1.34911e-78
gene2360	KQ76_RS11805	oxidoreductase	2955	40195	89876	449.114	1065.21	1.24599	Up	0	0
gene2021	KQ76_RS10110	sodium ABC transporter ATP-binding protein	897	806	1801	29.6678	70.3188	1.24501	Up	6.15382e-100	2.4775e-99
gene2020	KQ76_RS10105	membrane protein	681	283	631	13.7209	32.4513	1.24191	Up	5.01916e-36	1.28251e-35
gene455	KQ76_RS02280	stage V sporulation protein G	303	26764	59603	2916.42	6889.3	1.24016	Up	0	0
gene2725	KQ76_RS13630	hypothetical protein	1359	9772	21758	237.414	560.724	1.23989	Up	0	0
gene1973	KQ76_RS09870	hypothetical protein	453	76	168	5.53933	12.9886	1.22946	Up	1.50256e-10	2.65388e-10
gene1398	KQ76_RS06995	quinolone resistance protein NorB	1392	229	506	5.43173	12.731	1.22886	Up	9.2442e-29	2.20806e-28
gene2723	KQ76_RS13620	hypothetical protein	561	7325	16160	431.109	1008.85	1.22659	Up	0	0
gene940	KQ76_RS04705	bacteriocin ABC transporter ATP-binding protein	642	34	75	1.74858	4.09144	1.22642	Up	2.04206e-05	3.04576e-05
gene2757	KQ76_RS13790	histidinol dehydrogenase	1251	154	339	4.06448	9.49057	1.22342	Up	1.15952e-19	2.43637e-19
gene2221	KQ76_RS11110	hypothetical protein	261	9756	21402	1234.17	2871.86	1.21845	Up	0	0
gene1962	KQ76_RS09815	low molecular weight protein-tyrosine-phosphatase PtpA	465	19280	42282	1368.98	3184.58	1.21801	Up	0	0
gene2081	KQ76_RS10410	hypothetical protein	663	648	1421	32.2703	75.0638	1.21791	Up	1.32582e-76	4.68659e-76
gene602	KQ76_RS03015	cation:proton antiporter	426	541	1186	41.9305	97.5046	1.21747	Up	3.35232e-64	1.09951e-63
gene1389	KQ76_RS06950	thymidylate synthase	957	5952	13039	205.349	477.18	1.21645	Up	0	0
gene2543	KQ76_RS12720	alkylhydroperoxidase	423	1096	2396	85.5485	198.379	1.21345	Up	3.88488e-127	1.73929e-126
gene1035	KQ76_RS05180	hypothetical protein	615	1528	3335	82.0333	189.92	1.21111	Up	1.18506e-175	6.18811e-175
gene904	KQ76_RS04525	hypothetical protein	807	8000	17442	327.309	756.96	1.20956	Up	0	0
gene735	KQ76_RS03680	hypothetical protein	642	1564	3403	80.4348	185.642	1.20663	Up	3.7216e-178	1.97462e-177
gene763	KQ76_RS03820	transcriptional regulator	1014	11612	25247	378.104	872.011	1.20556	Up	0	0
gene1566	KQ76_RS07835	hypothetical protein	582	2144	4659	121.631	280.362	1.20478	Up	1.45372e-242	9.25956e-242
gene2780	KQ76_RS13905	membrane protein	192	58	126	9.97399	22.9837	1.20437	Up	4.93798e-08	8.13332e-08
gene2710	KQ76_RS13555	amino acid APC transporter	1431	18617	40390	429.548	988.517	1.20244	Up	0	0
gene2794	rnpA	ribonuclease P protein component	348	215	466	20.3986	46.8982	1.20106	Up	1.00119e-25	2.29178e-25
gene2484	KQ76_RS12425	6-carboxyhexanoate--CoA ligase	693	189	409	9.00473	20.67	1.19878	Up	1.04004e-22	2.28168e-22
gene96	KQ76_RS00485	bifunctional acetaldehyde-CoA/alcohol dehydrogenase	2610	1441	3118	18.2291	41.8394	1.19862	Up	1.0512e-161	5.21055e-161
gene1713	KQ76_RS08570	gamma-aminobutyrate permease	1494	7620	16427	168.402	385.086	1.19327	Up	0	0
gene157	KQ76_RS00790	xylose isomerase	969	613	1317	20.8871	47.6005	1.18836	Up	1.75594e-68	5.90613e-68
gene2240	KQ76_RS11205	lactose-specific phosphotransferase enzyme IIA component	312	172	369	18.2019	41.4211	1.18628	Up	2.51524e-20	5.35326e-20
gene964	KQ76_RS04825	acetyltransferase	552	387	828	23.148	52.5341	1.18236	Up	2.25806e-43	6.145e-43
gene56	KQ76_RS00285	L-lactate permease	1593	3332	7128	69.0607	156.712	1.18218	Up	0	0
gene100	KQ76_RS00505	polysaccharide biosynthesis protein EpsC	1824	2939	6285	53.2006	120.679	1.18165	Up	0	0
gene1961	KQ76_RS09810	hypothetical protein	207	670	1431	106.868	242.114	1.17986	Up	1.99129e-73	6.87308e-73
gene1567	KQ76_RS07840	membrane protein	219	503	1074	75.8343	171.755	1.17943	Up	1.58154e-55	4.81586e-55
gene1421	KQ76_RS07110	hypothetical protein	318	828	1763	85.9697	194.167	1.1754	Up	1.68056e-89	6.41337e-89
gene1661	KQ76_RS08310	hypothetical protein	183	3871	8230	698.416	1575.07	1.17325	Up	0	0
gene2429	KQ76_RS12150	ferredoxin--NADP reductase	1035	902	1914	28.7745	64.7667	1.17046	Up	2.28554e-96	9.07676e-96
gene2739	KQ76_RS13700	methionine sulfoxide reductase A	477	161	341	11.1442	25.0372	1.16778	Up	1.80165e-18	3.71459e-18
gene264	KQ76_RS01325	pseudouridine-5'-phosphate glycosidase	924	2061	4347	73.6458	164.766	1.16174	Up	8.20226e-214	4.82798e-213
gene2744	KQ76_RS13725	biofilm operon icaADBC HTH-type negative transcriptional regulator IcaR	561	2924	6166	172.09	384.938	1.16146	Up	2.77048e-302	1.96921e-301
gene567	KQ76_RS02840	mevalonate kinase	921	4726	9965	169.424	378.937	1.16132	Up	0	0
gene568	KQ76_RS02845	diphosphomevalonate decarboxylase	984	6619	13950	222.095	496.511	1.16065	Up	0	0
gene905	KQ76_RS04530	hypothetical protein	366	2927	6159	264.048	589.358	1.15834	Up	1.18109e-300	8.32765e-300
gene1810	KQ76_RS09055	ArsR family transcriptional regulator	315	60	126	6.28902	14.0091	1.15546	Up	1.3178e-07	2.13454e-07
gene1449	KQ76_RS07250	hypothetical protein	546	1375	2886	83.1481	185.12	1.15471	Up	2.87414e-141	1.34381e-140
gene842	KQ76_RS04215	thioesterase	375	1852	3883	163.062	362.649	1.15316	Up	5.67608e-189	3.0798e-188
gene367	KQ76_RS01840	hypothetical protein	537	376	788	23.1183	51.3927	1.15253	Up	8.99198e-40	2.37594e-39
gene1622	KQ76_RS08115	DNA polymerase III subunit delta	975	1598	3339	54.1146	119.939	1.14822	Up	1.11959e-161	5.53912e-161
gene1362	KQ76_RS06815	hypothetical protein	309	853	1780	91.1449	201.749	1.14633	Up	7.23392e-87	2.73293e-86
gene2677	KQ76_RS13390	acetyl-CoA synthetase	1599	11099	23118	229.18	506.351	1.14365	Up	0	0
gene627	KQ76_RS03140	iron-dicitrate ABC transporter ATP-binding protein	798	1789	3725	74.0201	163.483	1.14315	Up	7.12072e-179	3.78575e-178
gene2243	KQ76_RS11220	galactose-6-phosphate isomerase subunit LacB	516	572	1190	36.6006	80.7695	1.14194	Up	2.49046e-58	7.78121e-58
gene1246	KQ76_RS06235	MerR family transcriptional regulator	366	3531	7323	318.536	700.742	1.13743	Up	0	0
gene2607	KQ76_RS13040	pyruvate oxidase	1740	57478	119123	1090.67	2397.71	1.13644	Up	0	0
gene1303	KQ76_RS06520	nuclease SbcCD subunit D	1122	2011	4161	59.1781	129.884	1.13408	Up	4.69646e-197	2.59091e-196
gene2311	KQ76_RS11560	MarR family transcriptional regulator	441	220	455	16.4712	36.1346	1.13343	Up	4.50998e-23	9.96048e-23
gene2359	KQ76_RS11800	hypothetical protein	474	9397	19416	654.565	1434.6	1.13204	Up	0	0
gene381	KQ76_RS01910	hypothetical protein	699	32	66	1.51152	3.30687	1.12946	Up	0.000183608	0.000260588
gene569	KQ76_RS02850	phosphomevalonate kinase	1077	6815	14055	208.926	457.051	1.12937	Up	0	0
gene2242	KQ76_RS11215	tagatose-6-phosphate kinase	933	1135	2329	40.1658	87.4254	1.12209	Up	2.60376e-109	1.09682e-108
gene2538	KQ76_RS12695	hypothetical protein	819	58	119	2.33822	5.08877	1.1219	Up	5.53132e-07	8.7868e-07
gene1460	KQ76_RS07305	hypothetical protein	375	59	121	5.19473	11.3007	1.12129	Up	4.49278e-07	7.14995e-07
gene2450	KQ76_RS12255	hypothetical protein	453	4623	9466	336.952	731.843	1.11899	Up	0	0
gene2649	KQ76_RS13250	hydrolase	831	3693	7558	146.73	318.534	1.11828	Up	0	0
gene729	KQ76_RS03650	glycerate kinase	1125	11129	22748	326.622	708.175	1.11648	Up	0	0
gene2708	KQ76_RS13545	HTH-type transcriptional regulator ArcR	705	17141	34998	802.766	1738.62	1.11489	Up	0	0
gene2383	KQ76_RS11920	LysR family transcriptional regulator	885	431	879	16.0796	34.7853	1.11324	Up	7.32214e-42	1.96424e-41
gene2537	KQ76_RS12690	hypothetical protein	1302	51	104	1.29331	2.79751	1.11308	Up	3.33372e-06	5.12895e-06
gene2616	KQ76_RS13085	ATP-dependent Clp protease ATP-binding subunit ClpL	2106	48853	99542	765.905	1655.38	1.11193	Up	0	0
gene875	KQ76_RS04380	2-isopropylmalate synthase	1146	30	61	0.864328	1.86421	1.10891	Up	0.00039736	0.000552366
gene2777	KQ76_RS13890	membrane protein	513	15963	32408	1027.4	2212.51	1.10669	Up	0	0
gene660	KQ76_RS03305	hypothetical protein	390	996	2022	84.3212	181.579	1.10663	Up	4.38362e-93	1.70245e-92
gene2654	KQ76_RS13275	hypothetical protein	369	209	423	18.7009	40.148	1.10222	Up	1.11563e-20	2.38598e-20
gene1275	KQ76_RS06380	multidrug ABC transporter permease	732	44	89	1.98465	4.25823	1.10137	Up	2.02722e-05	3.02534e-05
gene1415	KQ76_RS07080	chromosome replication protein DnaD	687	3647	7371	175.275	375.768	1.10022	Up	0	0
gene2372	KQ76_RS11865	sodium transporter	918	207	416	7.44509	15.8709	1.09202	Up	4.41968e-20	9.35369e-20
gene77	KQ76_RS00390	glycosyltransferase family 1	1167	216	432	6.11118	12.9647	1.08507	Up	1.35309e-20	2.88914e-20
gene341	KQ76_RS01710	hypothetical protein	183	39	78	7.03648	14.9277	1.08507	Up	8.15426e-05	0.000118147
gene1956	KQ76_RS09785	general stress protein	516	9683	19366	619.587	1314.44	1.08507	Up	0	0
gene2462	KQ76_RS12315	glutathione S-transferase	468	253	506	17.8491	37.8664	1.08507	Up	7.46218e-24	1.66761e-23
gene48	KQ76_RS00245	1-phosphatidylinositol phosphodiesterase	987	45	90	1.50535	3.19356	1.08507	Up	2.2915e-05	3.40625e-05
gene2775	KQ76_RS13880	nickel transporter NixA	1053	1659	3314	52.0188	110.223	1.08333	Up	3.0074e-146	1.42379e-145
gene2669	KQ76_RS13350	L-lactate dehydrogenase 2	960	6365	12697	218.912	463.212	1.08132	Up	0	0
gene780	KQ76_RS03905	coagulase	1509	311	619	6.80477	14.3665	1.07809	Up	1.54642e-28	3.68374e-28
gene570	KQ76_RS02855	hypothetical protein	342	1055	2094	101.852	214.437	1.07409	Up	7.39806e-92	2.84798e-91
gene2495	KQ76_RS12480	hypothetical protein	387	227	447	19.3668	40.4526	1.06265	Up	1.3457e-20	2.8757e-20
gene745	KQ76_RS03730	hydrolase	651	415	817	21.0479	43.9532	1.06229	Up	2.72496e-36	6.98321e-36
gene1396	KQ76_RS06985	ribonuclease H	402	61	120	5.01009	10.4545	1.06122	Up	1.53889e-06	2.40407e-06
gene1388	KQ76_RS06945	dihydrofolate reductase	480	7811	15355	537.288	1120.36	1.0602	Up	0	0
gene1638	KQ76_RS08195	enterotoxin	414	76	149	6.06115	12.6048	1.05631	Up	9.39812e-08	1.5317e-07
gene1013	KQ76_RS05070	cytochrome D ubiquinol oxidase subunit I	1362	10822	21124	262.345	543.186	1.04998	Up	0	0
gene610	KQ76_RS03055	haloacid dehalogenase	582	62	121	3.51731	7.28136	1.04973	Up	1.72314e-06	2.68554e-06
gene2481	KQ76_RS12410	gamma-hemolysin component C	948	723	1411	25.1809	52.1277	1.04972	Up	2.913e-60	9.24378e-60
gene2610	KQ76_RS13055	LysR family transcriptional regulator	879	781	1522	29.3362	60.6423	1.04764	Up	1.17524e-64	3.86904e-64
gene454	KQ76_RS02275	endoribonuclease L-PSP	381	17474	33985	1514.29	3124.01	1.04476	Up	0	0
gene2405	KQ76_RS12030	TetR family transcriptional regulator	555	346	672	20.5838	42.4059	1.04276	Up	2.7184e-29	6.52862e-29
gene260	KQ76_RS01305	peptide ABC transporter permease	1050	13830	26843	434.886	895.348	1.04181	Up	0	0
gene2252	KQ76_RS11265	MerR family transcriptional regulator	447	353	685	26.0741	53.6702	1.0415	Up	9.01472e-30	2.17691e-29
gene2512	KQ76_RS12565	amino acid ABC transporter permease	696	636	1233	30.171	62.0446	1.04014	Up	4.0229e-52	1.18265e-51
gene45	KQ76_RS00230	membrane protein	603	634	1228	34.7147	71.3232	1.03882	Up	8.18696e-52	2.40145e-51
gene261	KQ76_RS01310	peptide ABC transporter ATP-binding protein	678	10853	21010	528.521	1085.29	1.03805	Up	0	0
gene2019	KQ76_RS10100	ABC transporter ATP-binding protein	873	1438	2783	54.3859	111.647	1.03764	Up	6.99518e-115	3.00918e-114
gene2425	KQ76_RS12130	hypothetical protein	630	25932	50072	1359.06	2783.58	1.03434	Up	0	0
gene2758	hisG	ATP phosphoribosyltransferase	615	50	96	2.68434	5.46696	1.02617	Up	2.92516e-05	4.32865e-05
gene872	KQ76_RS04365	O-acetyltransferase	1815	283	543	5.14816	10.4779	1.02522	Up	2.30564e-23	5.12213e-23
gene1854	KQ76_RS09275	serine protease	720	94	180	4.3106	8.75568	1.02233	Up	1.10476e-08	1.85558e-08
gene1954	KQ76_RS09775	regulatory protein RecX	819	2616	5005	105.462	214.028	1.02107	Up	1.06258e-199	5.96177e-199
gene1101	KQ76_RS05510	hypothetical protein	726	265	507	12.0518	24.458	1.02106	Up	8.76194e-22	1.89698e-21
gene429	KQ76_RS02150	acetyltransferase	525	1368	2613	86.0337	174.313	1.01871	Up	8.20316e-105	3.38525e-104
gene877	KQ76_RS04390	hypothetical protein	1119	44	84	1.29827	2.62905	1.01795	Up	0.000103739	0.00014965
gene1953	KQ76_RS09770	hypothetical protein	315	1017	1941	106.599	215.807	1.01755	Up	3.36664e-78	1.19971e-77
gene581	KQ76_RS02910	acetyltransferase	477	2269	4326	157.057	317.627	1.01604	Up	1.69127e-171	8.69374e-171
gene1855	KQ76_RS09280	serine protease SplE	717	96	183	4.42073	8.93885	1.0158	Up	9.98122e-09	1.6786e-08
gene2766	KQ76_RS13835	hypothetical protein	516	10956	20868	701.043	1416.38	1.01464	Up	0	0
gene2738	KQ76_RS13695	hypothetical protein	612	1159	2197	62.5279	125.727	1.00772	Up	6.82648e-87	2.5827e-86
gene2736	KQ76_RS13685	hypothetical protein	303	207	392	22.5564	45.3099	1.00629	Up	8.04422e-17	1.61805e-16
gene2071	KQ76_RS10360	LacI family transcriptional regulator	951	524	991	18.1925	36.4958	1.00439	Up	5.79326e-40	1.53536e-39
gene1136	KQ76_RS05685	dihydroorotase	1272	31436	1594	815.985	43.8885	-4.21663	Down	0	0
gene1137	KQ76_RS05690	carbamoyl-phosphate synthase small chain	1101	18515	999	555.237	31.7781	-4.127	Down	0	0
gene1134	KQ76_RS05675	uracil permease	1308	21185	1473	534.765	39.4407	-3.76115	Down	0	0
gene1138	KQ76_RS05695	carbamoyl phosphate synthase large subunit	3174	34744	3018	361.422	33.3014	-3.44003	Down	0	0
gene1139	KQ76_RS05700	orotidine 5'-phosphate decarboxylase	693	4404	641	209.824	32.3948	-2.69535	Down	0	0
gene996	KQ76_RS04985	phosphoribosylformylglycinamidine synthase subunit PurL	2190	51019	9198	769.183	147.095	-2.38658	Down	0	0
gene411	KQ76_RS02060	cystathionine beta-lyase	1143	15430	3086	445.72	94.5583	-2.23686	Down	0	0
gene995	KQ76_RS04980	phosphoribosylformylglycinamidine synthase subunit PurQ	672	17223	3544	846.217	184.703	-2.19582	Down	0	0
gene1140	KQ76_RS05705	orotate phosphoribosyltransferase	612	2719	566	146.69	32.3903	-2.17913	Down	0	0
gene1135	KQ76_RS05680	aspartate carbamoyltransferase	882	30554	6952	1143.78	276.052	-2.05079	Down	0	0
gene2189	KQ76_RS10950	cation transporter	981	40648	9453	1368.08	337.482	-2.01927	Down	0	0
gene173	KQ76_RS00870	glutaryl-CoA dehydrogenase	1212	27502	6544	749.21	189.1	-1.98622	Down	0	0
gene2073	KQ76_RS10370	oxidoreductase	225	739	180	108.444	28.0182	-1.95251	Down	3.18916e-74	1.1051e-73
gene997	KQ76_RS04990	amidophosphoribosyltransferase	1485	27810	6843	618.325	161.388	-1.93784	Down	0	0
gene994	KQ76_RS04975	phosphoribosylformylglycinamidine synthase	264	6890	1777	861.702	235.74	-1.86999	Down	0	0
gene2413	KQ76_RS12070	hemin ABC transporter ATP-binding protein	666	1473	380	73.0248	19.9829	-1.86962	Down	5.50254e-138	2.54565e-137
gene2074	KQ76_RS10375	membrane protein	1080	1519	393	46.4383	12.7444	-1.86545	Down	8.20978e-142	3.85904e-141
gene859	KQ76_RS04300	argininosuccinate synthase	1206	2067	575	56.5894	16.6982	-1.76084	Down	9.06392e-178	4.78989e-177
gene2458	KQ76_RS12295	cobalamin biosynthesis protein CbiX	753	9574	2673	419.798	124.324	-1.75559	Down	0	0
gene2570	KQ76_RS12855	GntR family transcriptional regulator	681	1066	298	51.6835	15.3257	-1.75376	Down	4.37656e-92	1.68728e-91
gene174	KQ76_RS00875	hypothetical protein	1506	43929	12579	963.093	292.53	-1.71909	Down	0	0
gene2470	KQ76_RS12355	arginine ABC transporter ATP-binding protein	732	104223	29880	4701.05	1429.62	-1.71735	Down	0	0
gene2188	KQ76_RS10945	ArsR family transcriptional regulator	321	7526	2270	774.107	247.668	-1.64412	Down	0	0
gene120	KQ76_RS00605	hypothetical protein	975	2029	616	68.7099	22.1272	-1.6347	Down	2.43836e-157	1.19516e-156
gene358	KQ76_RS01795	L-cystine transporter tcyP	1389	14617	4574	347.455	115.33	-1.59105	Down	0	0
gene998	KQ76_RS04995	phosphoribosylformylglycinamidine cyclo-ligase	1029	14474	4553	464.425	154.964	-1.58351	Down	0	0
gene1570	KQ76_RS07855	glycine dehydrogenase (decarboxylating)	1473	72889	23280	1633.81	553.516	-1.56154	Down	0	0
gene119	KQ76_RS00600	sulfonate ABC transporter ATP-binding protein	741	1339	432	59.6629	20.4181	-1.54699	Down	1.32045e-96	5.25192e-96
gene172	KQ76_RS00865	3-hydroxyacyl-CoA dehydrogenase	2262	28087	9224	409.973	142.816	-1.52137	Down	0	0
gene2414	KQ76_RS12075	hemin ABC transporter permease	1056	1566	518	48.9632	17.1797	-1.51099	Down	6.67216e-109	2.79722e-108
gene2471	KQ76_RS12360	amino acid ABC transporter permease	720	60034	20329	2753	988.857	-1.47717	Down	0	0
gene121	KQ76_RS00610	sulfonate ABC transporter permease	762	927	314	40.1668	14.4319	-1.47674	Down	4.31962e-63	1.40281e-62
gene993	KQ76_RS04970	phosphoribosylaminoimidazole-succinocarboxamide synthase	705	8833	3058	413.677	151.914	-1.44525	Down	0	0
gene2732	KQ76_RS13665	hypothetical protein	6708	71305	25418	350.969	132.708	-1.40309	Down	0	0
gene521	KQ76_RS02610	DNA-directed RNA polymerase subunit beta'	3624	463153	168831	4219.67	1631.6	-1.37084	Down	0	0
gene2508	KQ76_RS12545	epimerase	852	32579	12159	1262.53	499.814	-1.33685	Down	0	0
gene463	KQ76_RS02320	stage V sporulation protein B	1527	6950	2606	150.275	59.7703	-1.33011	Down	0	0
gene134	KQ76_RS00675	isochorismatase	558	41411	15706	2450.32	985.783	-1.31363	Down	0	0
gene1295	KQ76_RS06480	secretion protein	864	24637	9426	941.491	382.088	-1.30104	Down	0	0
gene999	KQ76_RS05000	phosphoribosylglycinamide formyltransferase	567	7141	2752	415.832	169.987	-1.29058	Down	0	0
gene1030	KQ76_RS05155	spermidine/putrescine ABC transporter permease	810	2538	988	103.454	42.7191	-1.27604	Down	4.05272e-136	1.87163e-135
gene118	KQ76_RS00595	hypothetical protein	513	4311	1722	277.461	117.562	-1.23887	Down	1.55916e-219	9.30207e-219
gene366	KQ76_RS01835	GMP synthase [glutamine-hydrolyzing]	1542	30599	12273	655.186	278.751	-1.23293	Down	0	0
gene135	KQ76_RS00680	pyruvate decarboxylase	1641	146709	59191	2951.82	1263.27	-1.22444	Down	0	0
gene1133	KQ76_RS05670	bifunctional protein PyrR	528	3299	1333	206.296	88.4191	-1.22228	Down	5.49858e-165	2.77242e-164
gene2472	KQ76_RS12365	amino acid ABC transporter substrate-binding protein	780	50974	20670	2157.73	928.102	-1.21716	Down	0	0
gene1747	KQ76_RS08740	membrane protein	771	4796	1968	205.384	89.3965	-1.20003	Down	3.66144e-232	2.25589e-231
gene2286	KQ76_RS11435	50S ribosomal protein L14	369	34829	14383	3116.43	1365.13	-1.19086	Down	0	0
gene2796	KQ76_RS13985	cadmium-transporting ATPase	2181	45746	18930	692.531	303.98	-1.1879	Down	0	0
gene2285	KQ76_RS11430	50S ribosomal protein L24	318	32777	13581	3403.17	1495.73	-1.18603	Down	0	0
gene1571	KQ76_RS07860	glycine dehydrogenase	1347	65068	26961	1594.93	701	-1.18601	Down	0	0
gene2443	KQ76_RS12220	HTH-type transcriptional regulator SarZ	447	11497	4771	849.218	373.811	-1.18383	Down	0	0
gene1128	ileS	isoleucine--tRNA ligase	2754	28517	11887	341.886	151.167	-1.17737	Down	0	0
gene541	KQ76_RS02710	bis(5'-nucleosyl)-tetraphosphatase	3504	65745	27572	619.499	275.584	-1.16861	Down	0	0
gene1293	KQ76_RS06470	GMP reductase	978	18463	7761	623.312	277.926	-1.16526	Down	0	0
gene2193	KQ76_RS10970	iron ABC transporter ATP-binding protein	783	2801	1182	118.112	52.8695	-1.15964	Down	2.62334e-129	1.18252e-128
gene2403	KQ76_RS12020	multidrug MFS transporter	1938	11810	4991	201.205	90.1953	-1.15754	Down	0	0
gene2284	KQ76_RS11425	50S ribosomal protein L5	540	49853	21282	3048.17	1380.28	-1.14298	Down	0	0
gene122	KQ76_RS00615	butyryl-CoA dehydrogenase	1035	2227	951	71.0431	32.1803	-1.14252	Down	8.02462e-101	3.25053e-100
gene2289	KQ76_RS11450	50S ribosomal protein L16	435	55579	23898	4218.55	1924.08	-1.13258	Down	0	0
gene2287	KQ76_RS11440	30S ribosomal protein S17	264	25160	10848	3146.65	1439.12	-1.12864	Down	0	0
gene1312	KQ76_RS06565	DNA topoisomerase IV subunit A	2403	43526	18808	598.049	274.119	-1.12546	Down	0	0
gene175	KQ76_RS00880	hypothetical protein	1563	67666	29331	1429.4	657.231	-1.12094	Down	0	0
gene1720	KQ76_RS08605	dephospho-CoA kinase	624	25726	11159	1361.22	626.312	-1.11995	Down	0	0
gene992	KQ76_RS04965	N5-carboxyaminoimidazole ribonucleotide synthase	1125	26610	11557	780.97	359.785	-1.11813	Down	0	0
gene2299	KQ76_RS11500	guanine permease	1335	92115	40186	2278.2	1054.25	-1.11168	Down	0	0
gene1908	KQ76_RS09545	glutamate ABC transporter permease	1458	1279	559	28.9638	13.4278	-1.10903	Down	5.01434e-56	1.53397e-55
gene2569	KQ76_RS12850	gluconokinase	1554	1896	830	40.2837	18.7058	-1.10671	Down	6.52398e-82	2.39941e-81
gene1666	aspS	aspartate--tRNA ligase	1767	34159	15079	638.279	298.872	-1.09466	Down	0	0
gene2791	KQ76_RS13960	ribosomal RNA small subunit methyltransferase G	720	8191	3624	375.618	176.281	-1.09139	Down	0	0
gene1171	KQ76_RS05860	cell division protein FtsY	1251	13723	6091	362.188	170.522	-1.08678	Down	0	0
gene171	KQ76_RS00860	acetyl-CoA acetyltransferase	1185	11047	4982	307.8	147.243	-1.06379	Down	0	0
gene2606	KQ76_RS13035	PTS system glucoside-specific EIICBA component	2067	2610	1178	41.691	19.9597	-1.06264	Down	4.98372e-105	2.05989e-104
gene2288	KQ76_RS11445	50S ribosomal protein L29	210	11944	5433	1877.9	906.088	-1.0514	Down	0	0
gene2283	rpsN	30S ribosomal protein S14 type Z	186	8279	3769	1469.63	709.681	-1.05021	Down	0	0
gene1070	KQ76_RS05355	phenylalanine--tRNA ligase beta subunit	2403	16989	7759	233.43	113.084	-1.04559	Down	0	0
gene1188	gid	methylenetetrahydrofolate--tRNA-(uracil-5-)-methyltransferase TrmFO	1308	38643	17694	975.45	473.771	-1.04188	Down	0	0
gene718	KQ76_RS03595	ribonucleotide-diphosphate reductase subunit beta	972	61698	28389	2095.79	1022.9	-1.03482	Down	0	0
gene234	KQ76_RS01175	protein EssB	1335	805	372	19.9093	9.75914	-1.02862	Down	5.90712e-32	1.44903e-31
gene1002	KQ76_RS05015	cobalt ABC transporter permease	807	49727	23004	2034.51	998.343	-1.02708	Down	0	0
gene2279	KQ76_RS11400	30S ribosomal protein S5	501	35743	16555	2355.57	1157.29	-1.02533	Down	0	0
gene2382	KQ76_RS11915	urocanate hydratase	1662	6853	3177	136.142	66.9478	-1.024	Down	1.24963e-256	8.23821e-256
gene7	KQ76_RS00040	histidine ammonia-lyase	1515	1087	506	23.6897	11.6974	-1.01808	Down	7.07386e-42	1.89957e-41
